# Supplementary material for: Quantitative and rapid lateral flow immunoassay for cardiac troponin I using dendritic mesoporous silica nanoparticles and gold nanoparticles
Source: Royal Society of Chemistry journal article supplement (doi:10.1039/d4ay02060j), 2024-12-03
Supplement: d4ay02060j1.pdf [file d4ay02060j1.pdf]

**Supplementary Information**

**Quantitative and rapid lateral flow immunoassay for cardiac troponin I using dendritic mesoporous silica nanoparticles and gold nanoparticles**

Yafei Li<sup>a</sup>, Yu Yao<sup>a</sup>, Qingqing Hua<sup>a</sup>, Jishun Li<sup>a, b,\*</sup>

*<sup>a</sup>Guangxi Key Laboratory of Electrochemical and Magneto-chemical Functional Materials, College of Chemistry and Bioengineering, Guilin University of Technology, Guilin, 541004, China*

*<sup>b</sup>College of Environmental Science and Engineering, Guilin University of Technology, Guilin, 541004, China*

*\*Corresponding author. js.li@glut.edu.cn*

**1. Synthesis of colloidal gold nanoparticles (AuNPs)**

The AuNPs was synthesized via the sodiumcitrate reduction method. Briefly, 100 mL of a 0.01%HAuCl<sub>4</sub> solution was heated to boiling. Upon reaching a boil, 1.6 mL of a 1% trisodium citrate solution was added while stirring continuously. Over time, the color of the solutionchanged to wine red, indicating the successful synthesis of colloidal gold. The finished product was then boiled for 5 min and cooled to room temperature. The diameter of the preparedcolloidal gold was approximately 25 nm (Figure S1).

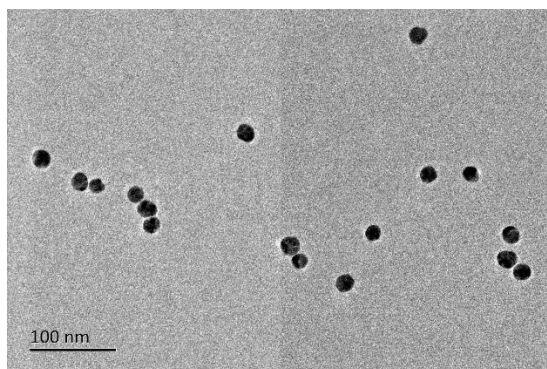

**Figure S1. TEM images of AuNPs.**

## 2. Synthesis of dendritic mesoporous silica nanoparticles ( DMSNs )

The method of synthesizing DMSNs was referred to Gao et al. and Yang et al.<sup>1,2</sup> 408 mg of TEA was added to 150 ml of water and stirred at 80 °C for 30 min. 2.28 g of CTAB and 1.105 g of NaSal were then added to the mixture and stirred for 1 h. Then, 24 mL of TEOS and 1.58 mL of ethanol were added to the above solution, and stirring was continued for 2 h. High-speed centrifugation at 11,000 rpm for 15 min was performed to isolate the silica nano- particles were separated from the suspension and washed thoroughly with ethanol to remove the residual reactants. The synthesized dendritic mesoporous silica was finally dispersed in 200 mL of ethanol by extraction with acidic methanol (3 mL of 37 % HCl dissolved in 50 mL of anhydrous methanol) for three times (6 h each) at 60 °C.<sup>3</sup> The synthesis of other DMSNs of different sizes is shown in Table S1

For surface amination of DMSNs, 1 mL of 50 mg mL<sup>-1</sup> DMSNs solution was taken and 62 µL APTES and 40 µL ammonia were added and stirred at room temperature for 12 h. The suspension was collected by high-speed centrifugation at 10,000 rpm for 20 min, washed twice with ethanol and twice with water. The resulting aminated DMSNs were dispersed in 50 mL of water.

**Table S1. Specific reagent ratios for the synthesis of several different silica.**

| Size of DMSNs<br>(nm) | TEA<br>(mg) | CTAB<br>(g) | NaSal<br>(g) | TEOS<br>(mL) | Ethanol<br>(mL) |
|-----------------------|-------------|-------------|--------------|--------------|-----------------|
| 120                   | 408         | 2.28        | 0.512        | 24           | 0.65            |
| 270                   | 408         | 2.28        | 1.105        | 24           | 1.58            |
| 400                   | 408         | 2.28        | 2.056        | 24           | 3.09            |

1

### 2 3. Evaluatideon of the inter batch differences

3 In order to assess the differences between different DMSNs@Au batches, five  
4 different batches of DMSNs@Au were selected as LFIA markers for the detection  
5 of three different concentrations of cTnI The results showed that different batches  
6 of DMSNs@Au had almost no effect on the detection results, which proved the  
7 reliability and reproducibility of the experiment.

8 **Table S2. Evaluatideon of the inter batch differences**

| Concentration of<br>cTnI (ng mL <sup>-1</sup> ) | S <sub>T</sub> /S <sub>C</sub> detected by different batches of<br>DMSNs@Au as markers |       |       |       |       | RSD<br>(%) |
|-------------------------------------------------|----------------------------------------------------------------------------------------|-------|-------|-------|-------|------------|
|                                                 |                                                                                        |       |       |       |       |            |
|                                                 | 1                                                                                      | 2     | 3     | 4     | 5     |            |
| 0                                               | 0.112                                                                                  | 0.110 | 0.110 | 0.109 | 0.110 | 0.110      |
| 10                                              | 0.330                                                                                  | 0.331 | 0.331 | 0.330 | 0.332 | 0.084      |
| 50                                              | 0.998                                                                                  | 0.996 | 0.997 | 0.996 | 0.996 | 0.089      |

9

## 1 REFERENCES

- 2 1 F. Gao, Y. Liu, C. Lei, C. Liu, H. Song, Z. Gu, P. Jiang, S. Jing, J. Wan and C. Yu,  
3 *Small Methods*, 2021, **5**, 2000924.
- 4 2 Y. Yang, J. Tang, H. Song, Y. Yang, Z. Gu, J. Fu, Y. Liu, M. Zhang, Z. Qiao and C.  
5 Yu, *Angew Chem Int Ed*, 2020, **59**, 19610–19617.
- 6 3 L. Huang, T. Liao, J. Wang, L. Ao, W. Su and J. Hu, *Adv. Funct. Mater.*

7
